# Supplementary material for: UiO-67 metal–organic gel material deposited on photonic crystal matrix for photoelectrocatalytic hydrogen production
Source: Royal Society of Chemistry journal article supplement (doi:10.1039/d0ra00868k), 2020-01-01
Supplement: d0ra00868k1.pdf [file d0ra00868k1.pdf]

## Electronic Supplementary Information

UiO-67 metal-organic gel material deposited on photonic crystal matrix for photoelectrocatalytic hydrogen production

Shujian Sun, Peisen Liao, Lihua Zeng, Lanqi He, Jianyong Zhang\*

*Sun Yat-Sen University, MOE Laboratory of Polymeric Composite and Functional Materials, School of Materials Science and Engineering, Guangzhou 510275, China. E-mail: zhjyong@mail.sysu.edu.cn.*

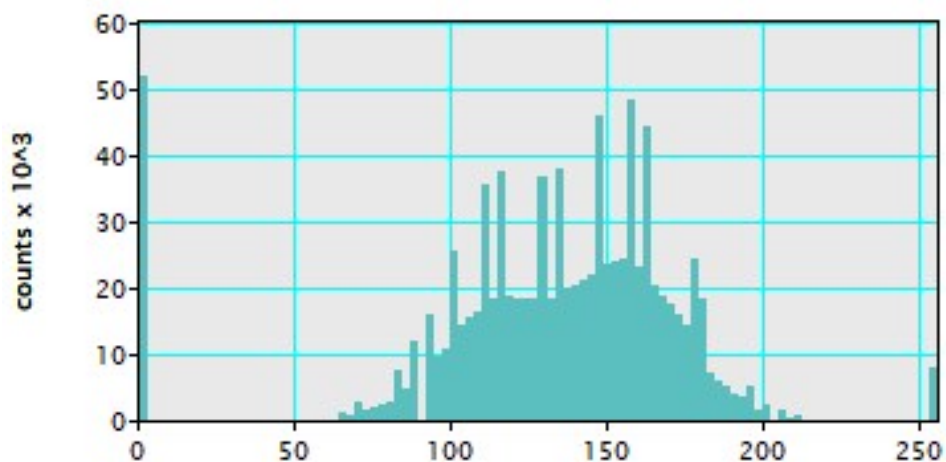

**Fig. S1** Statistical particle size distribution of UiO-67/B.

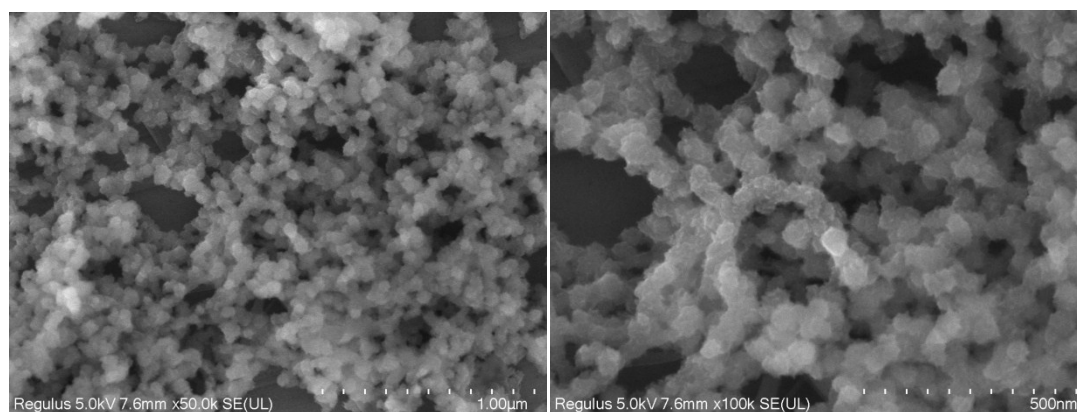

**Fig. S2** SEM images of UiO-67 gel (performed using an ultra-high resolution Zeiss Gemini SEM 500 Field-Emission-SEM. Wet UiO-67 gel was dispersed into ethanol by ultrasound. Samples were treated via Au sputtering before observation.)

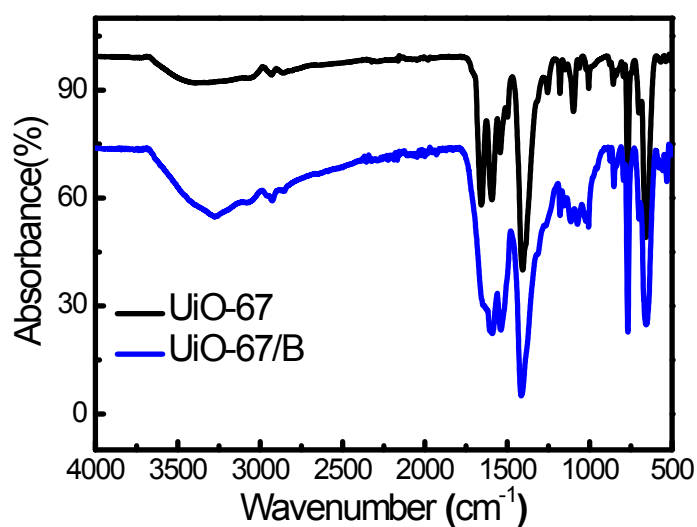

**Fig. S3** FT-IR spectra of UiO-67/B and UiO-67.

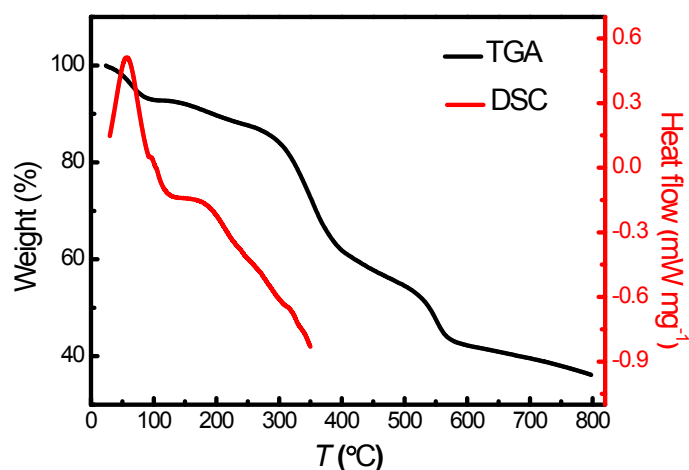

**Fig. S4** TG-DSC curves of UiO-67/B recorded under nitrogen atmosphere.

Thermogravimetric analysis (TGA) was performed using a TG 209 F3 Tarsus instrument at heating rate of 10 °C min<sup>-1</sup> from 35 to 800 °C under nitrogen atmosphere. Differential scanning calorimetry (DSC) was carried out using Netzsch DSC-204 in the range of 35 - 350 °C under nitrogen stream at heating rate of 10 °C min<sup>-1</sup>.

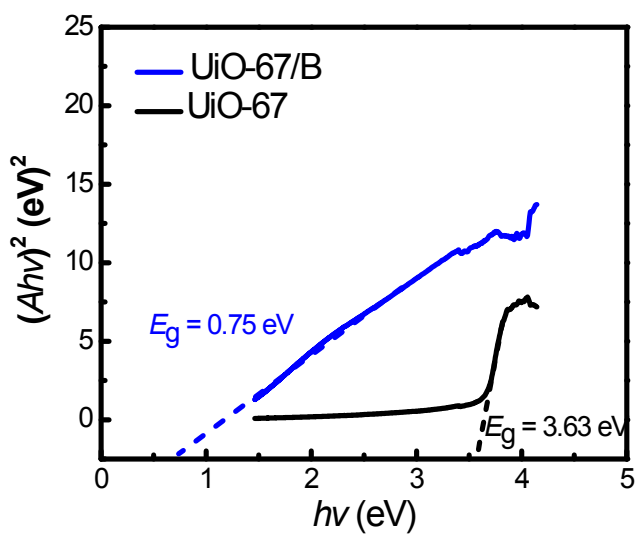

**Fig. S5** Band gap calculation of UiO-67 and UiO-67.

The positive slope indicates that UiO-67/B are n-type semiconductors with electron conduction which are trapped from the potonic crystal. In addition, the slopes determined from the analysis of Mott-Schottky plot were used to estimate the carrier density using the equation

$$\frac{1}{C^2} = \frac{2}{e\epsilon_0\epsilon N_A}(V - V_{FB})$$

(L. Yu, G. Li, X. Zhang, X. Ba, G. Shi, Y. Li, P. K. Wong, J. C. Yu and Y. Yu, *ACS Catal.*, 2016, **6**, 6444-6454.)

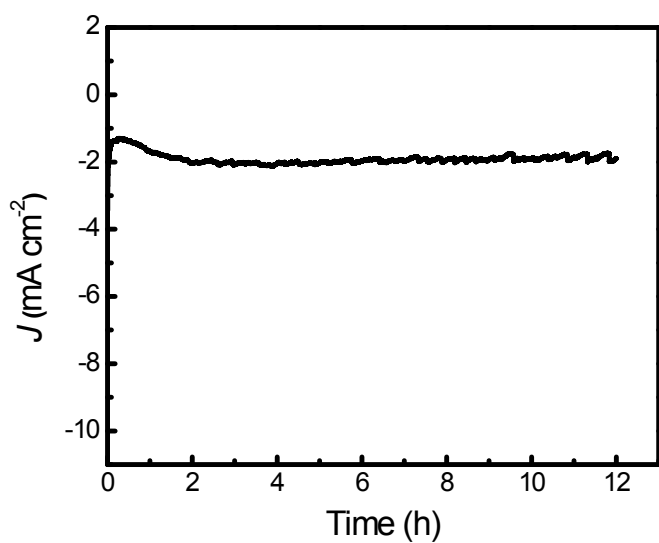

**Fig. S6** HER stability test for UiO-67/B at -0.7 V vs RHE using GCE as working electrode.

The stability test was performed on a three-electrode system (CHI660E), which included an Ag/AgCl reference electrode, a carbon rod counter electrode, and glassy carbon electrode as a working electrode. The working electrode was prepared as follows: UiO-67/B (0.2 cm × 0.2 cm) was clipped and attached to the surface of GCE with 0.5 wt% Nafion and dried in air. The stability test was conducted in 0.5 mol L<sup>-1</sup> H<sub>2</sub>SO<sub>4</sub>. The results were calibrated with respect to RHE by  $E(\text{RHE}) = E(\text{Ag/AgCl}) + 0.197 \text{ V}$ .

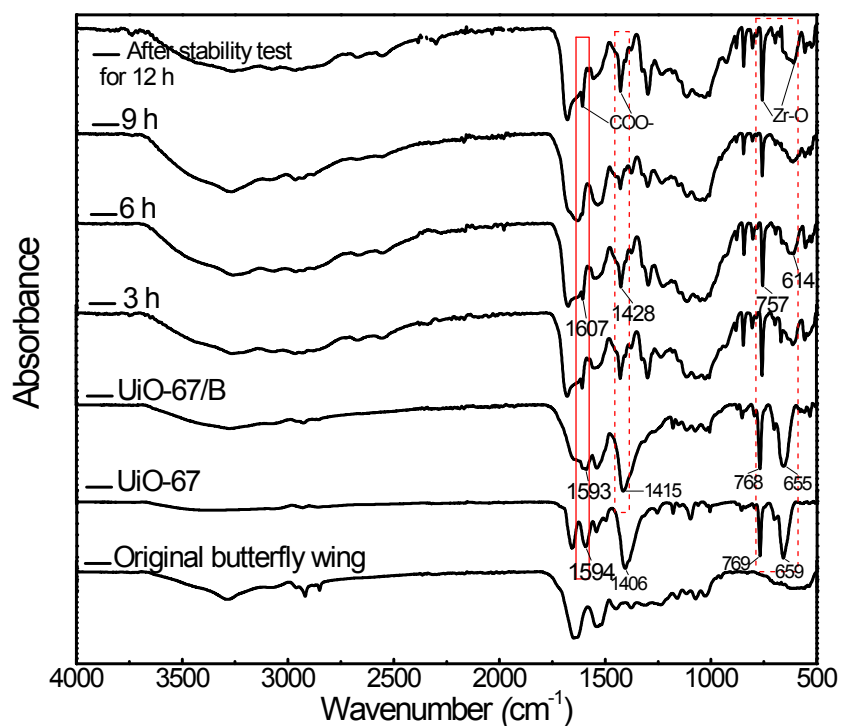

**Fig. S7** FT-IR spectra of UiO-67/B over time during the HER stability test.

**Table S1** Electrocatalytic performance of UiO-67/B and UiO-67.

| Catalyst | Onset potential<br>(mV vs. RHE) <sup>a</sup> | Tafel slope<br>(mV dec <sup>-1</sup> ) |
|----------|----------------------------------------------|----------------------------------------|
| UiO-67/B | 449                                          | 220                                    |
| UiO-67   | 586                                          | 228                                    |

<sup>a</sup> Potential at which current density exceeded 1 mA cm<sup>-2</sup>.
